# Supplementary material
Source: HighWire-hosted journal article supplement (http://molpharm.aspetjournals.org/highwire/filestream/76485/field_highwire_adjunct_files/1/SupFig2.pdf)

**A**

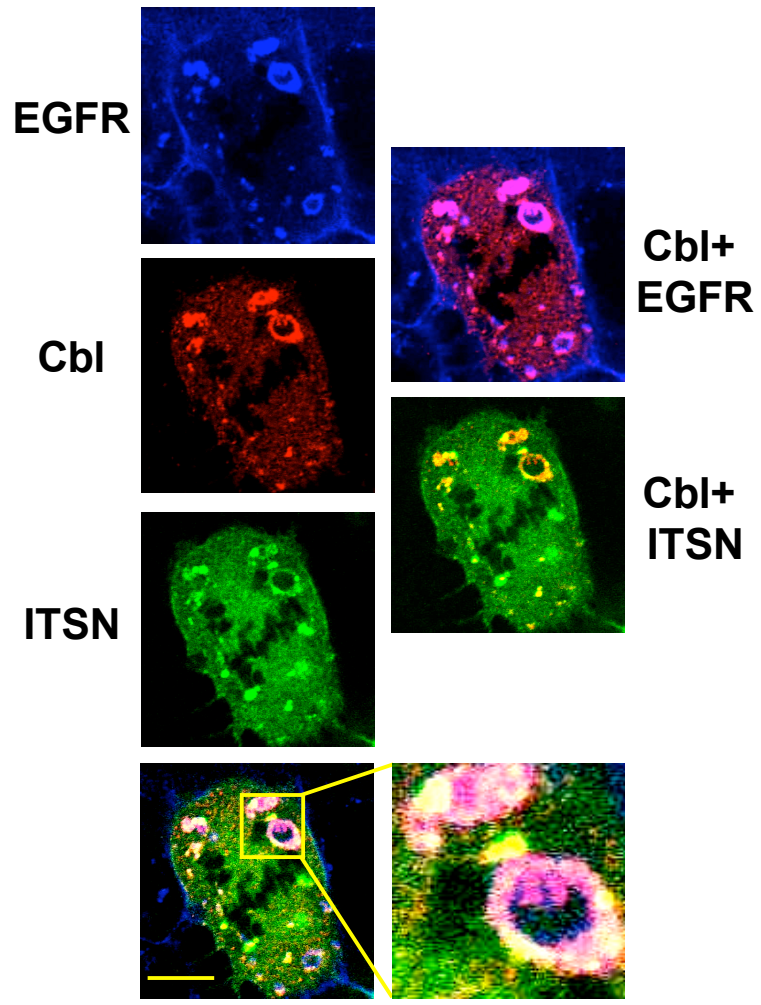

**B**

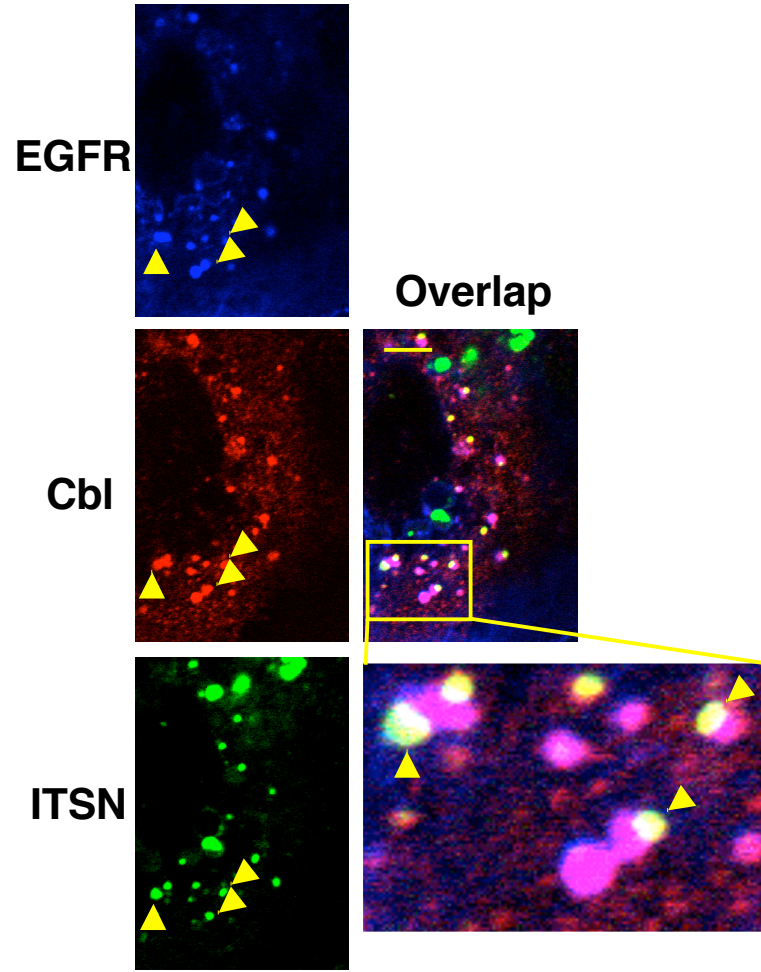

Supplement: SupFig2.pdf [file SupFig2.pdf]
